# Supplementary material for: Fluorescence characterisation of multiply-loaded anti-HER2 single chain Fv-photosesitizer conjugates suitable for photodynamic therapy
Source: Royal Society of Chemistry journal article supplement (doi:10.1039/b708320c), 2007-08-06
Supplement: b708320c.pdf [file b708320c.pdf]

Supplementary Material (ESI) for Photochemical & Photobiological Sciences  
This journal is © The Royal Society of Chemistry and Owner Societies 2007

**Electronic Supplementary Information**

**Fluorescence Characterisation of Multiply-Loaded Anti-HER2 Single Chain Fv-  
Photosensitizer Conjugates Suitable for Photodynamic Therapy**

Marina K. Kuimova,<sup>a</sup> Manpreet Bhatti,<sup>b</sup> Mahendra Deonarain,<sup>\*b</sup> Gokhan Yahioğlu,<sup>\*a, c</sup>  
James A. Levitt,<sup>d</sup> Ioanna Stamati,<sup>b</sup> Klaus Suhling<sup>d</sup> and David Phillips<sup>\*a</sup>

<sup>a</sup> *Department of Chemistry, Faculty of Natural Sciences, Imperial College London,  
Exhibition Road, SW7 2AZ, UK;*

<sup>b</sup> *Division of Cell and Molecular Biology, Faculty of Natural Sciences, Imperial College  
London, Exhibition Road, SW7 2AZ, UK;*

<sup>c</sup> *PhotoBiotics Ltd, 21 Wilson Street, London, EC2M 2TD, UK*

<sup>d</sup> *Department of Physics, King's College London, Strand, London WC2R 2LS, UK*

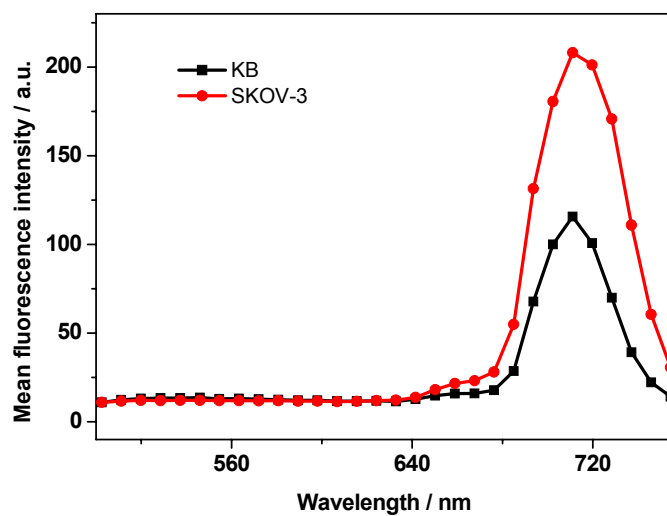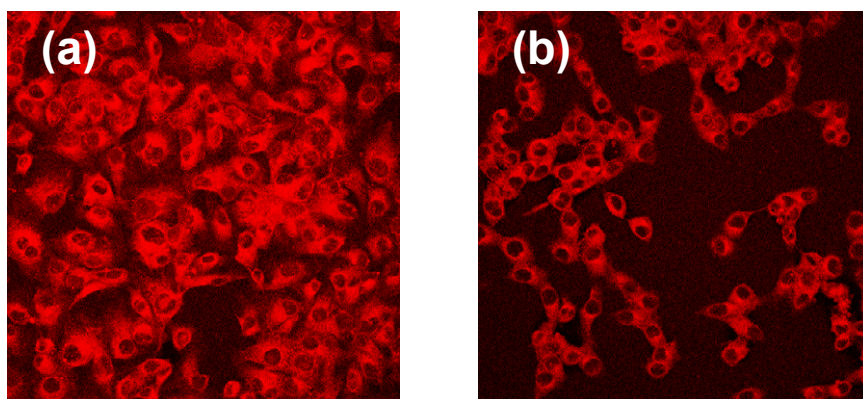

Fig 1 Fluorescence spectra and corresponding confocal fluorescence images (650-730 nm detection) obtained from fixed HER2-positive SKOV-3 cells (a) and HER2-negative KB cells incubated with C6.5-VP.

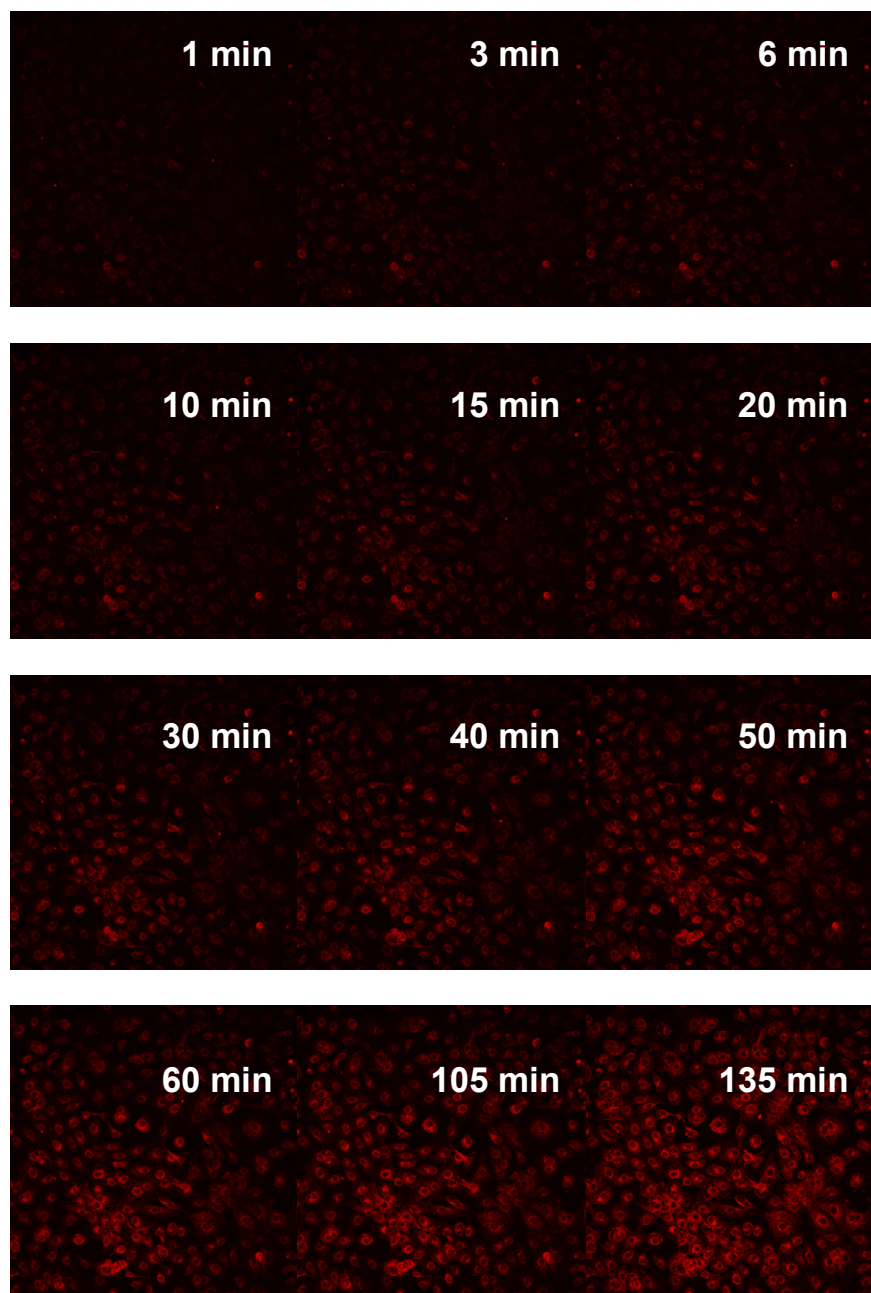

Fig 2 A series of confocal fluorescence images recorded for SKOV-3 cells at different time points during incubation with 1 μM solution of free verteporfin (VP) in culture medium.

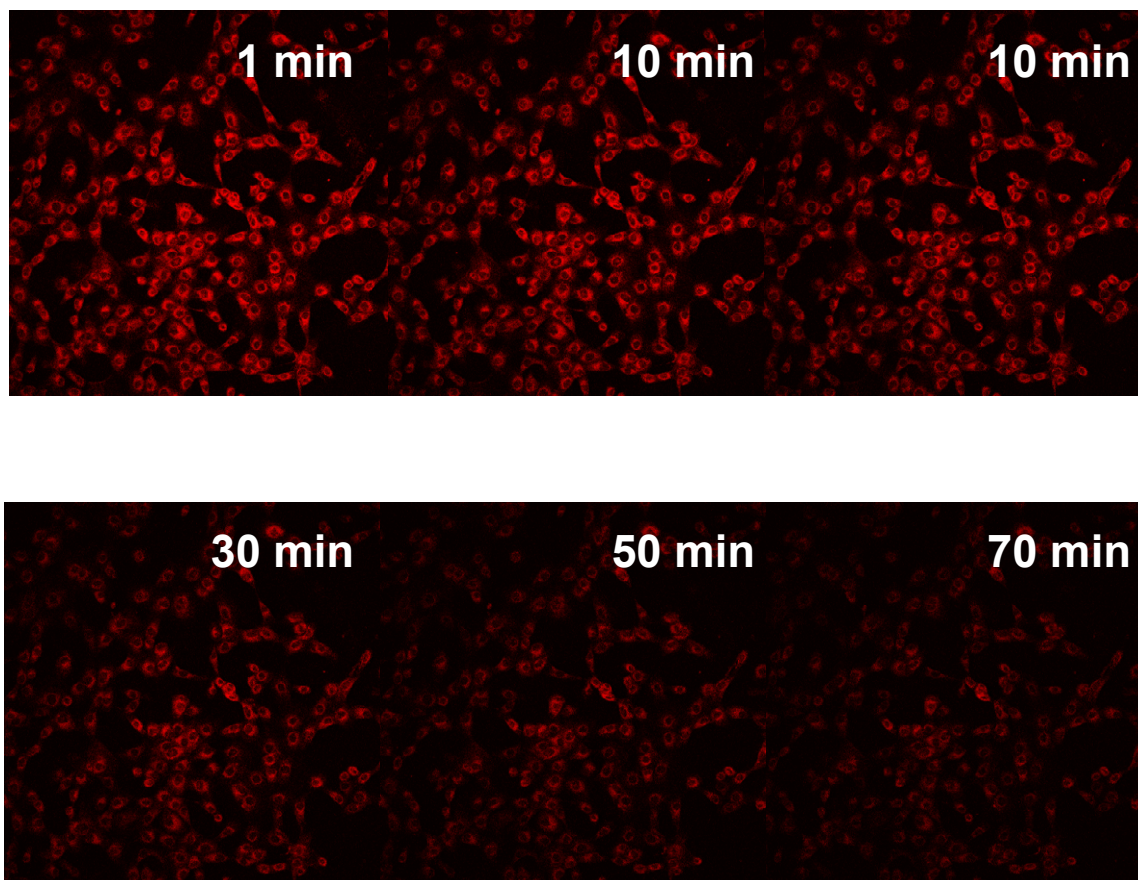

Fig. 3 A series of confocal fluorescence images recorded for SKOV-3 cells at different time points following replacement of  $1\mu\text{M}$  solution of free verteporfin (VP) in culture medium with blank culture medium. Prior to washing and medium change the cells were incubated with VP for 2.5h.

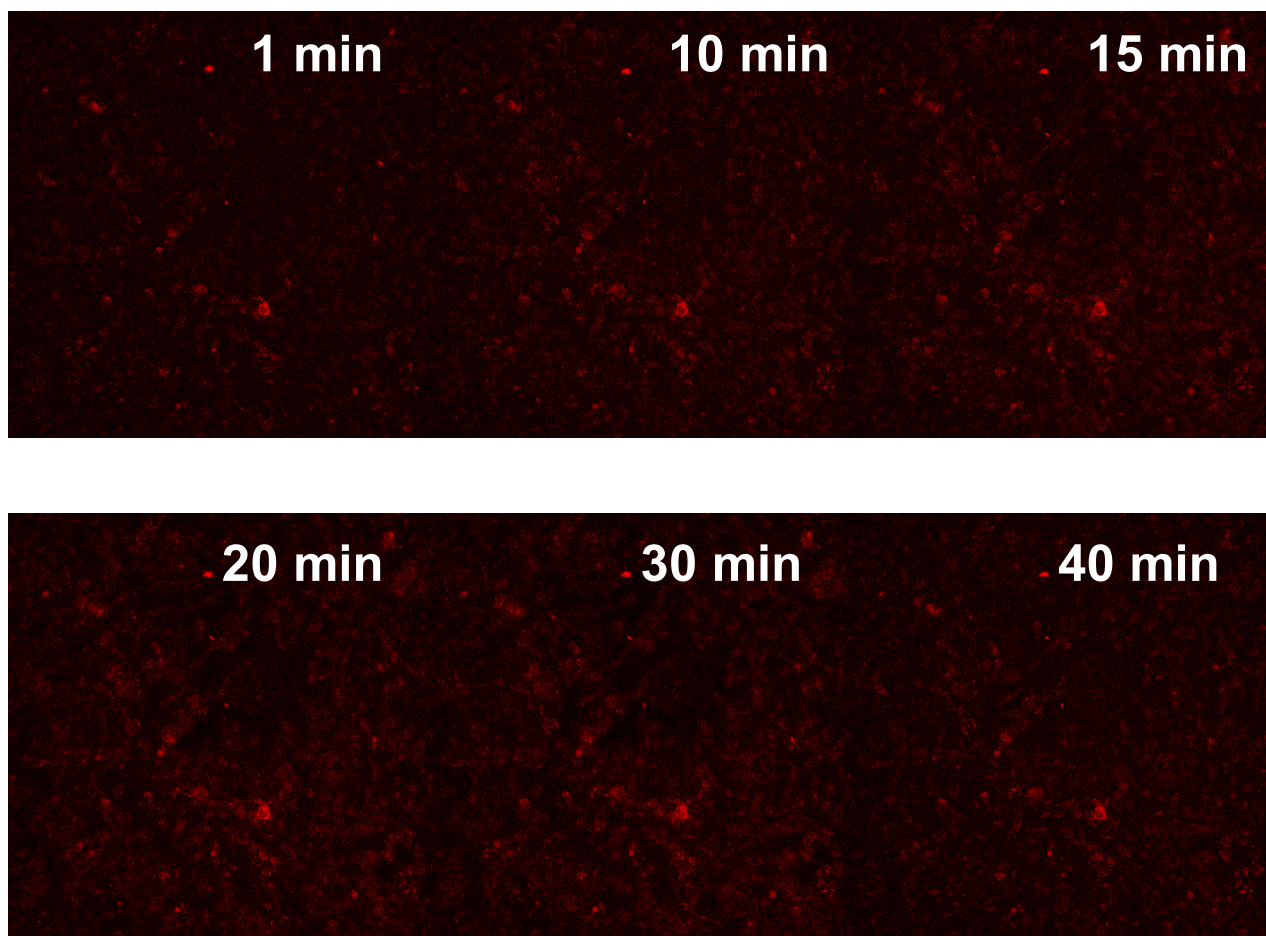

Fig 4 A series of confocal fluorescence images recorded for SKOV-3 cells at different time points during incubation with solution of C6.5-VP in culture medium.



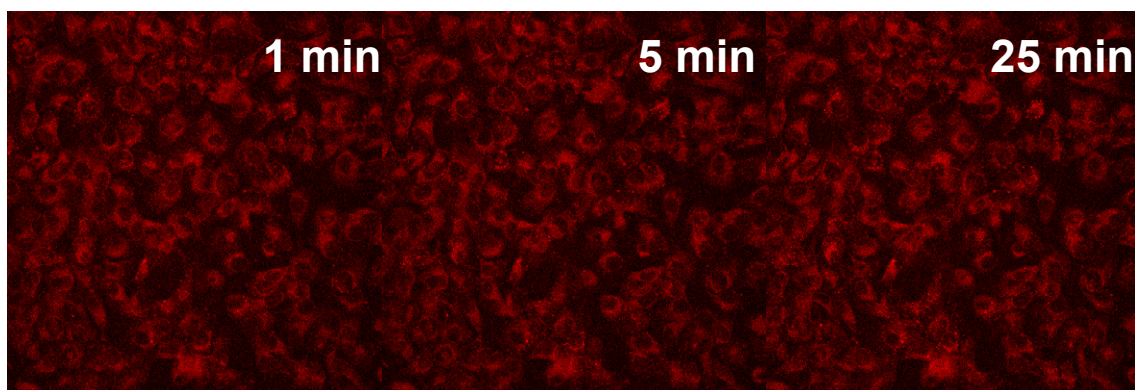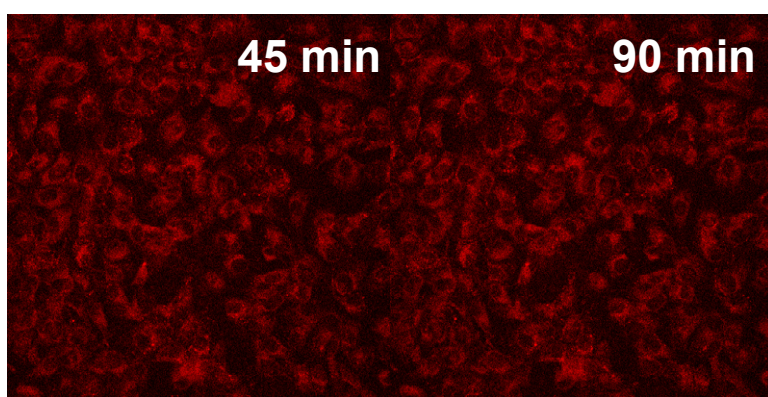

Fig. 5 A series of confocal fluorescence images recorded for SKOV-3 cells at different time points following replacement of solution of C6.5-VP in culture medium with fresh culture medium. Prior to washing and medium change the cells were incubated with C6.5-VP for 30 min.

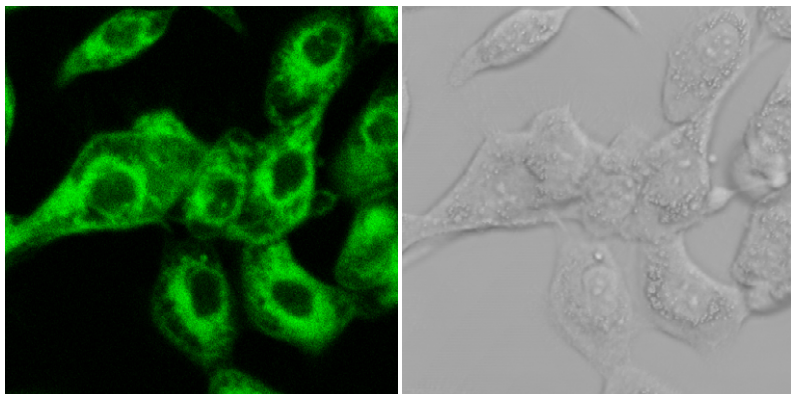

Fig. 6 Confocal fluorescence and transmission images recorded for SKOV-3 cells incubated with free VP for 30 min (650-730 nm detection).
